# Supplementary material
Source: PubMed Central journal article supplement (PMC1413818)

A

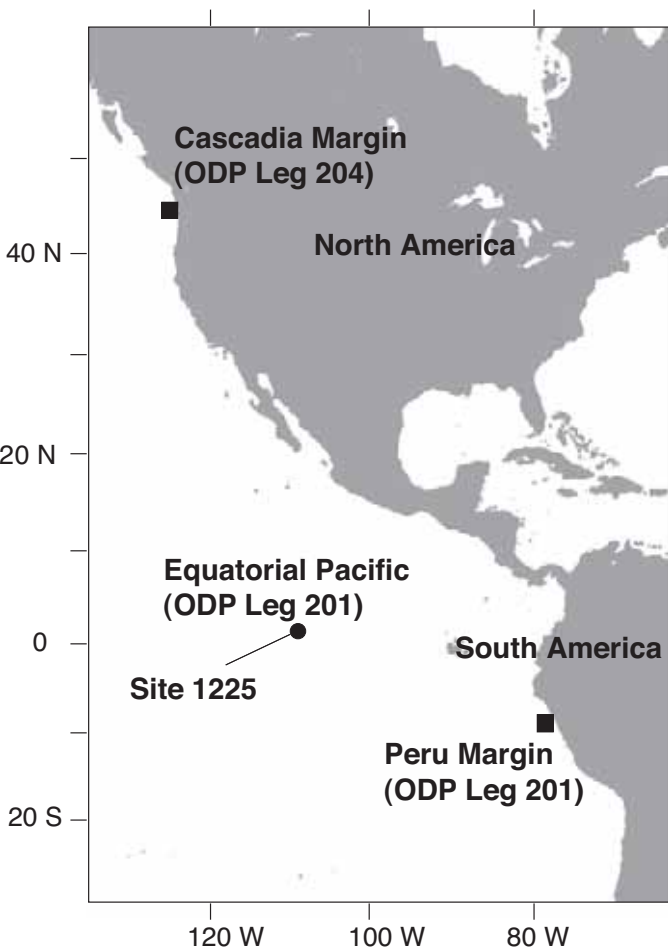

B

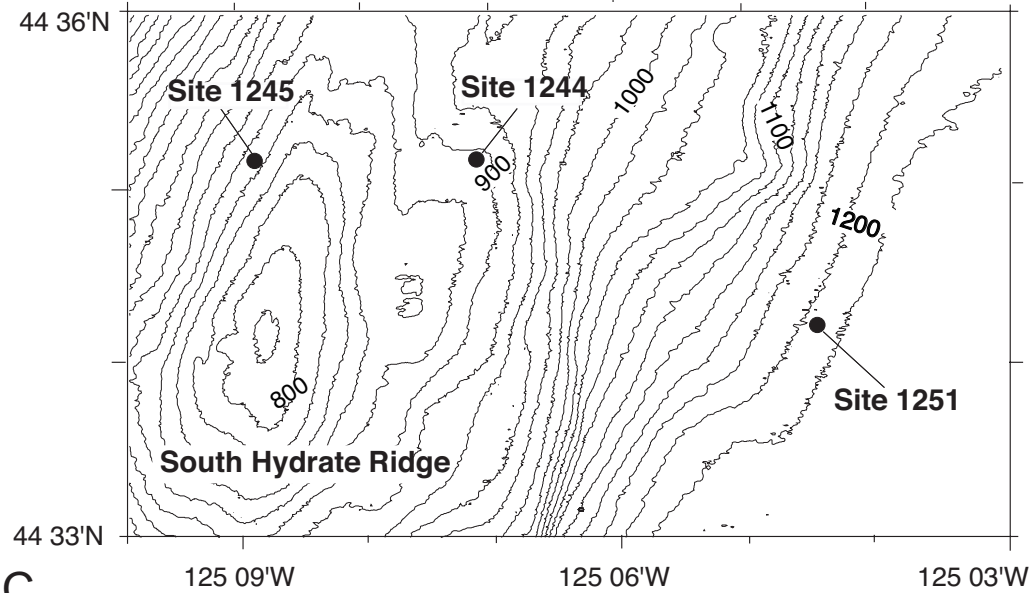

C

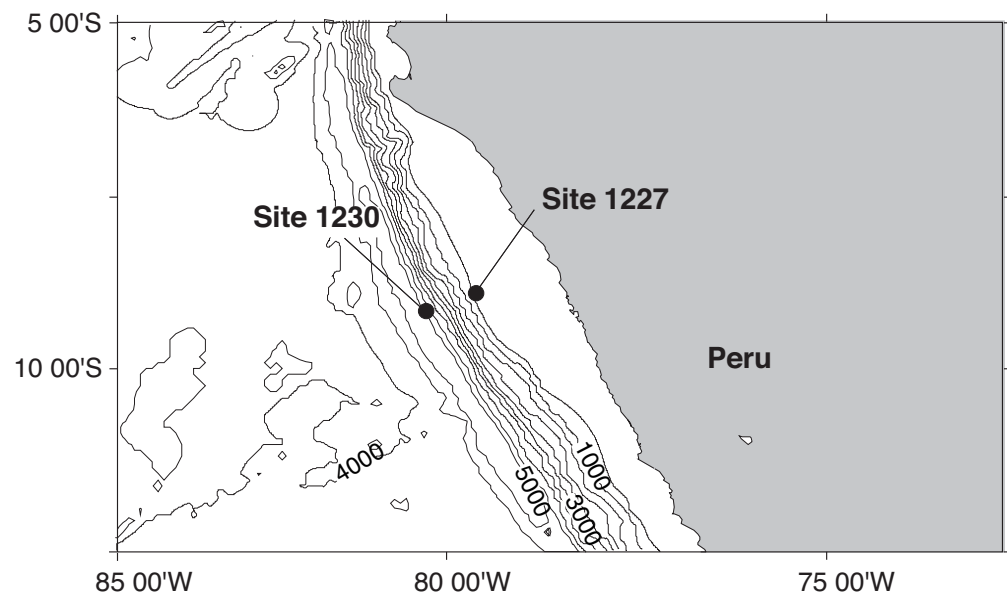

Supplement: pnas_0511033103_1.pdf [file pnas_0511033103_1.pdf]

A

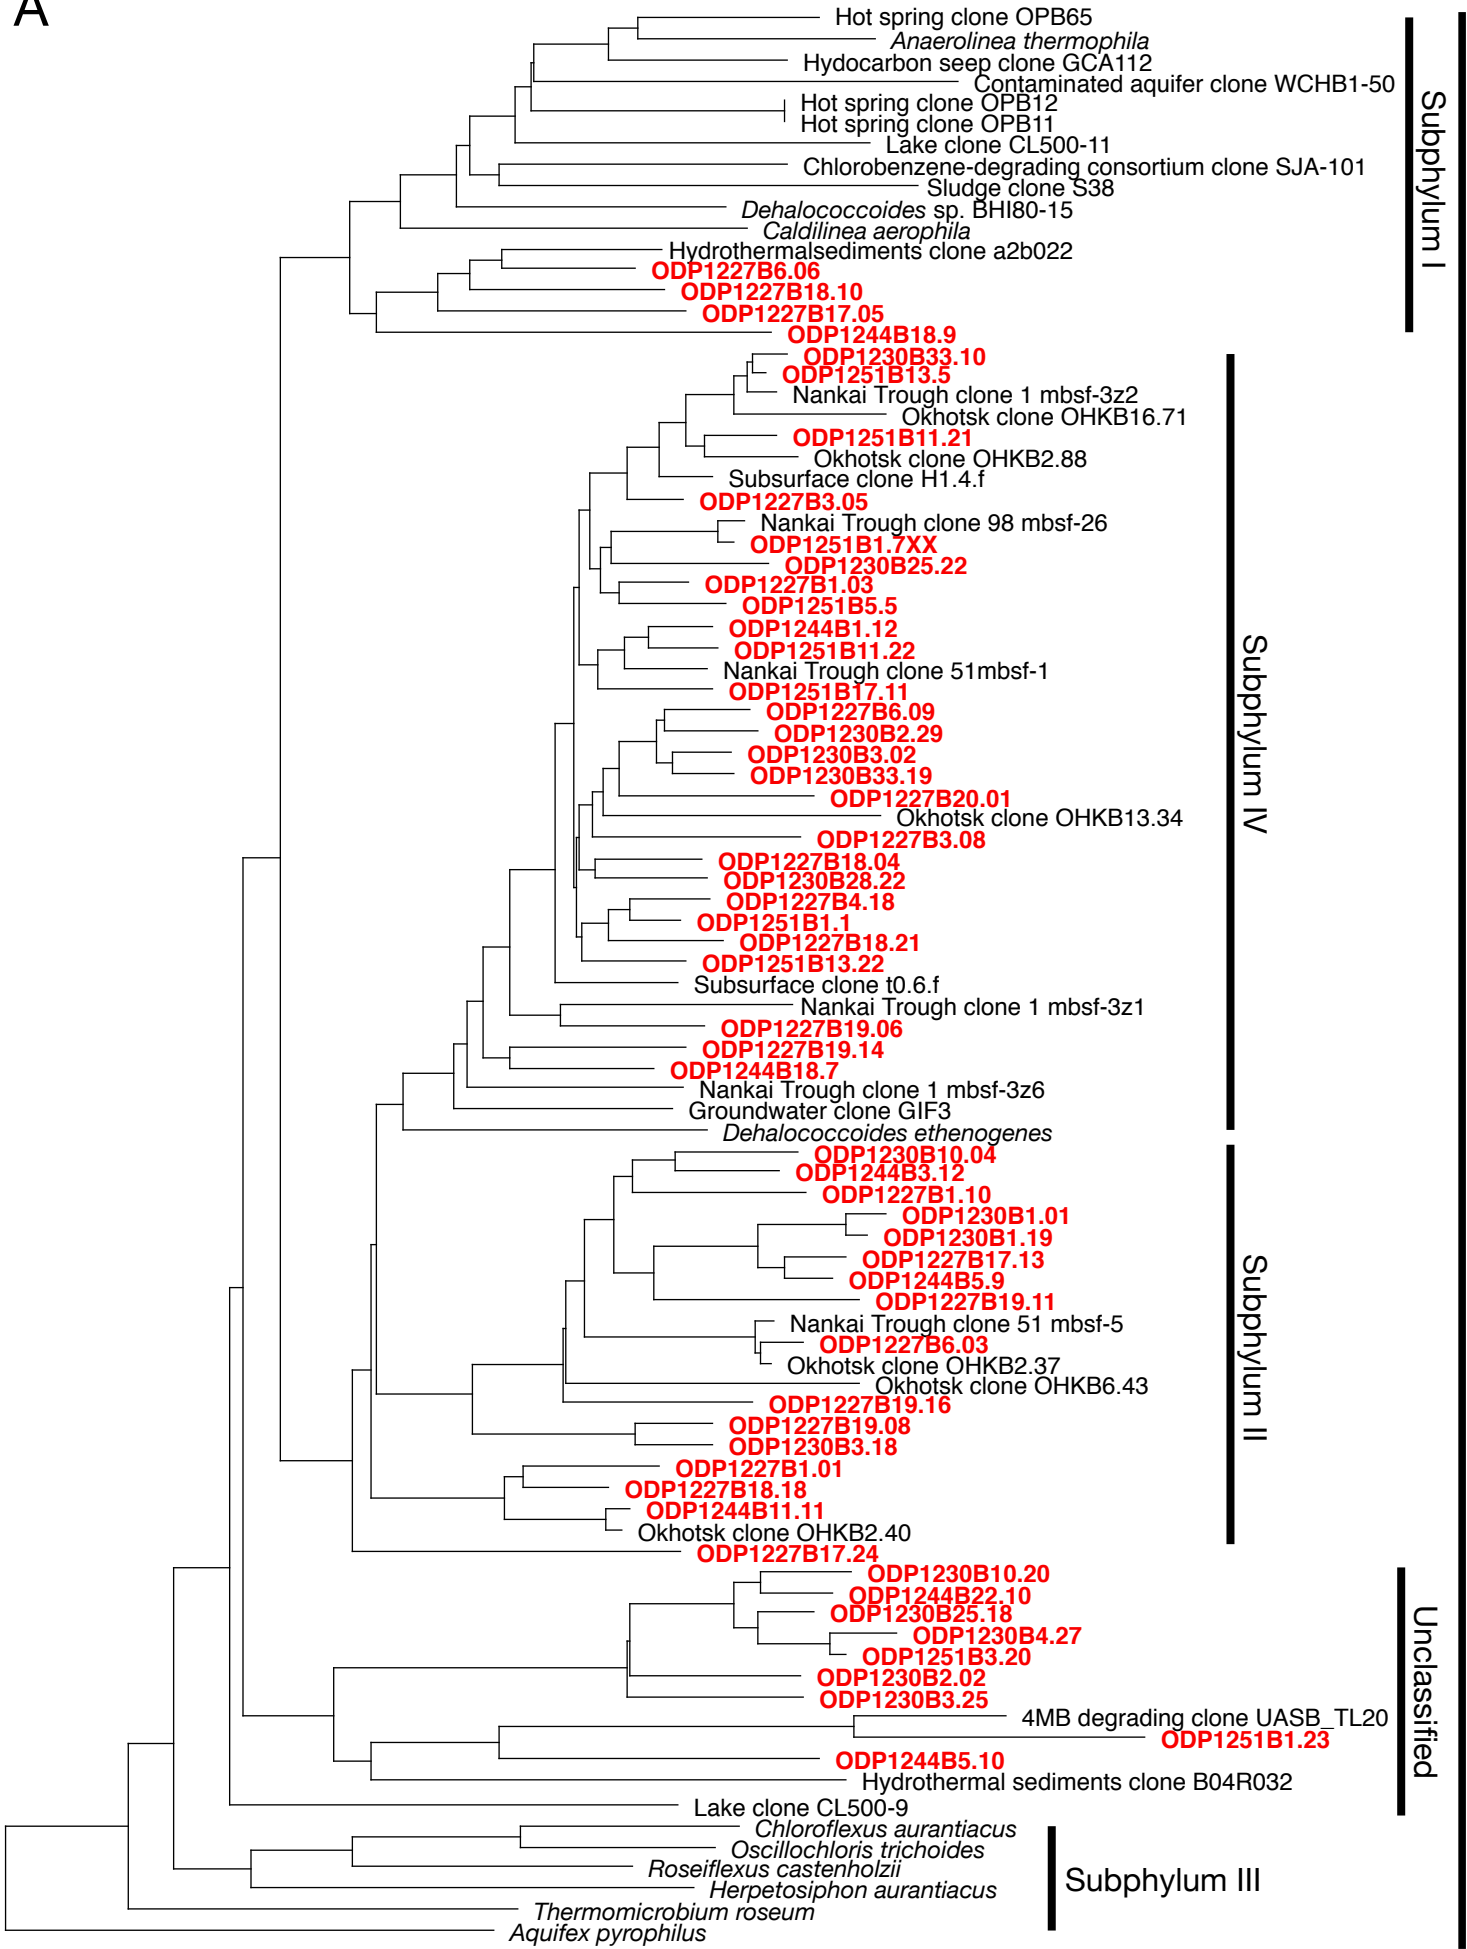

— 0.01 substitutions/site

B

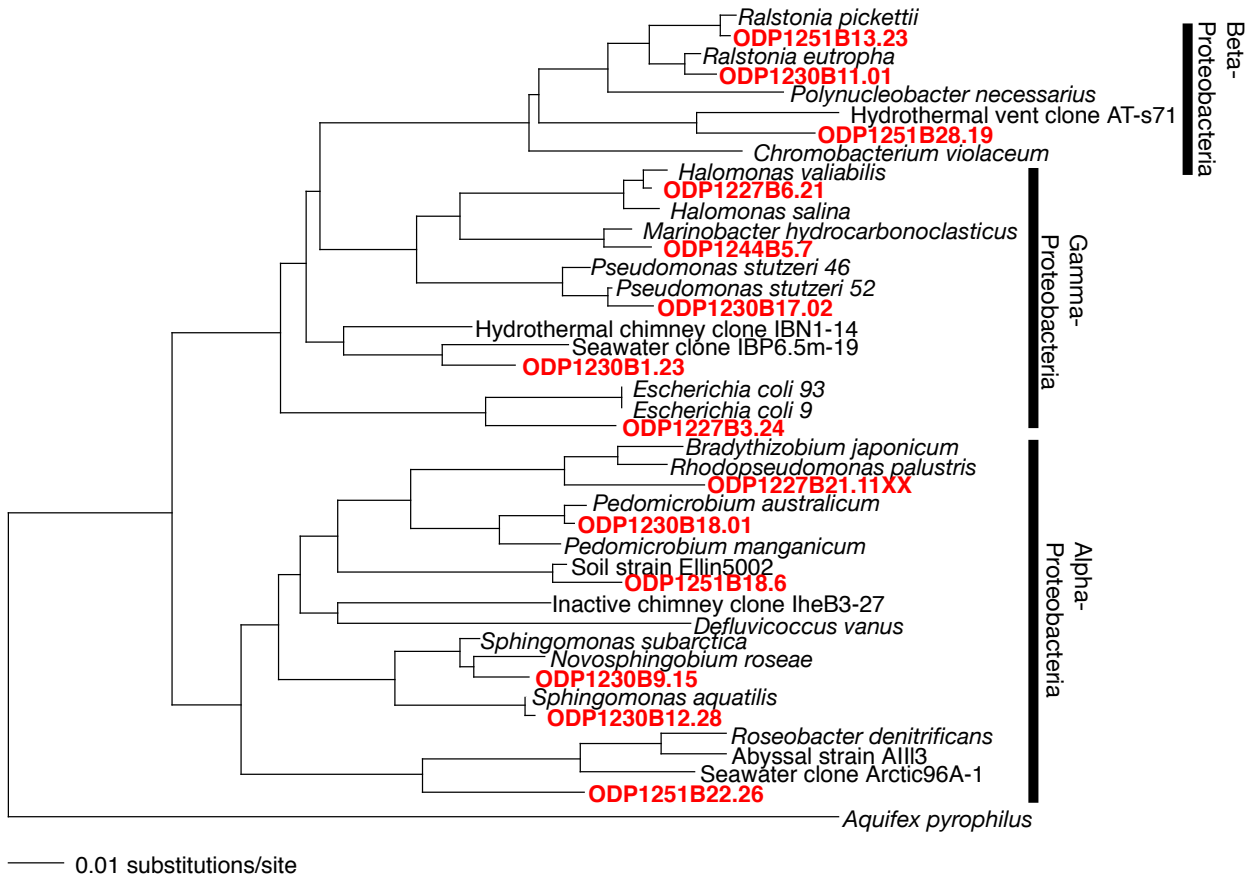

C

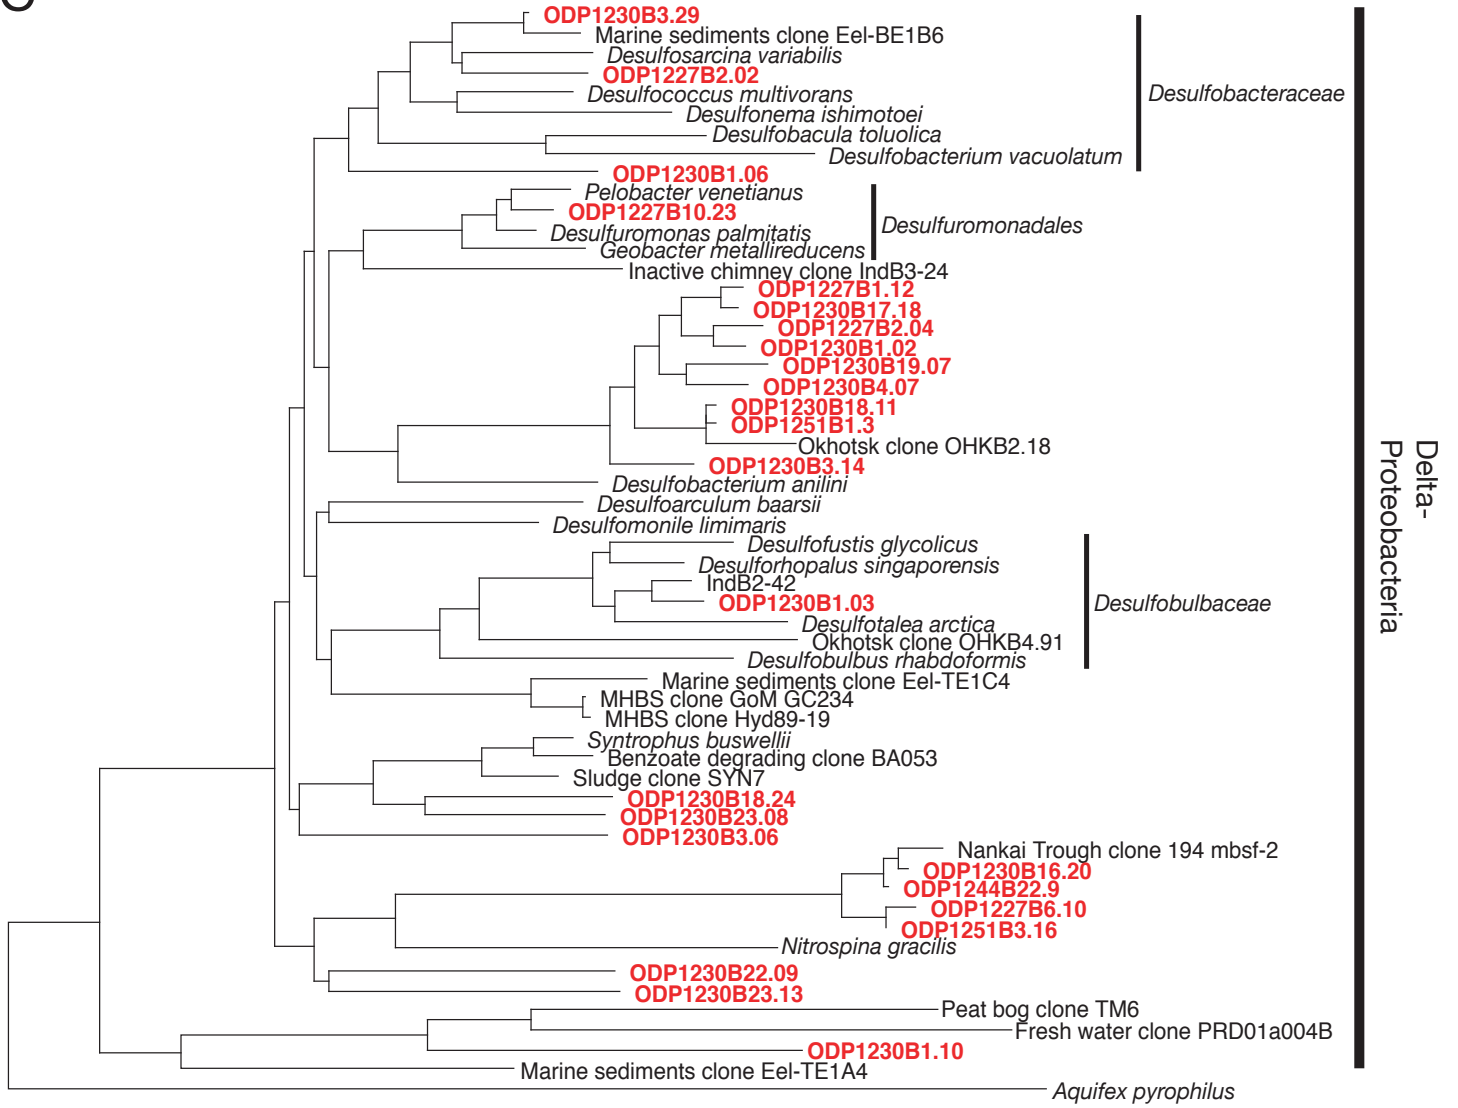

0.01 substitutions/site

D

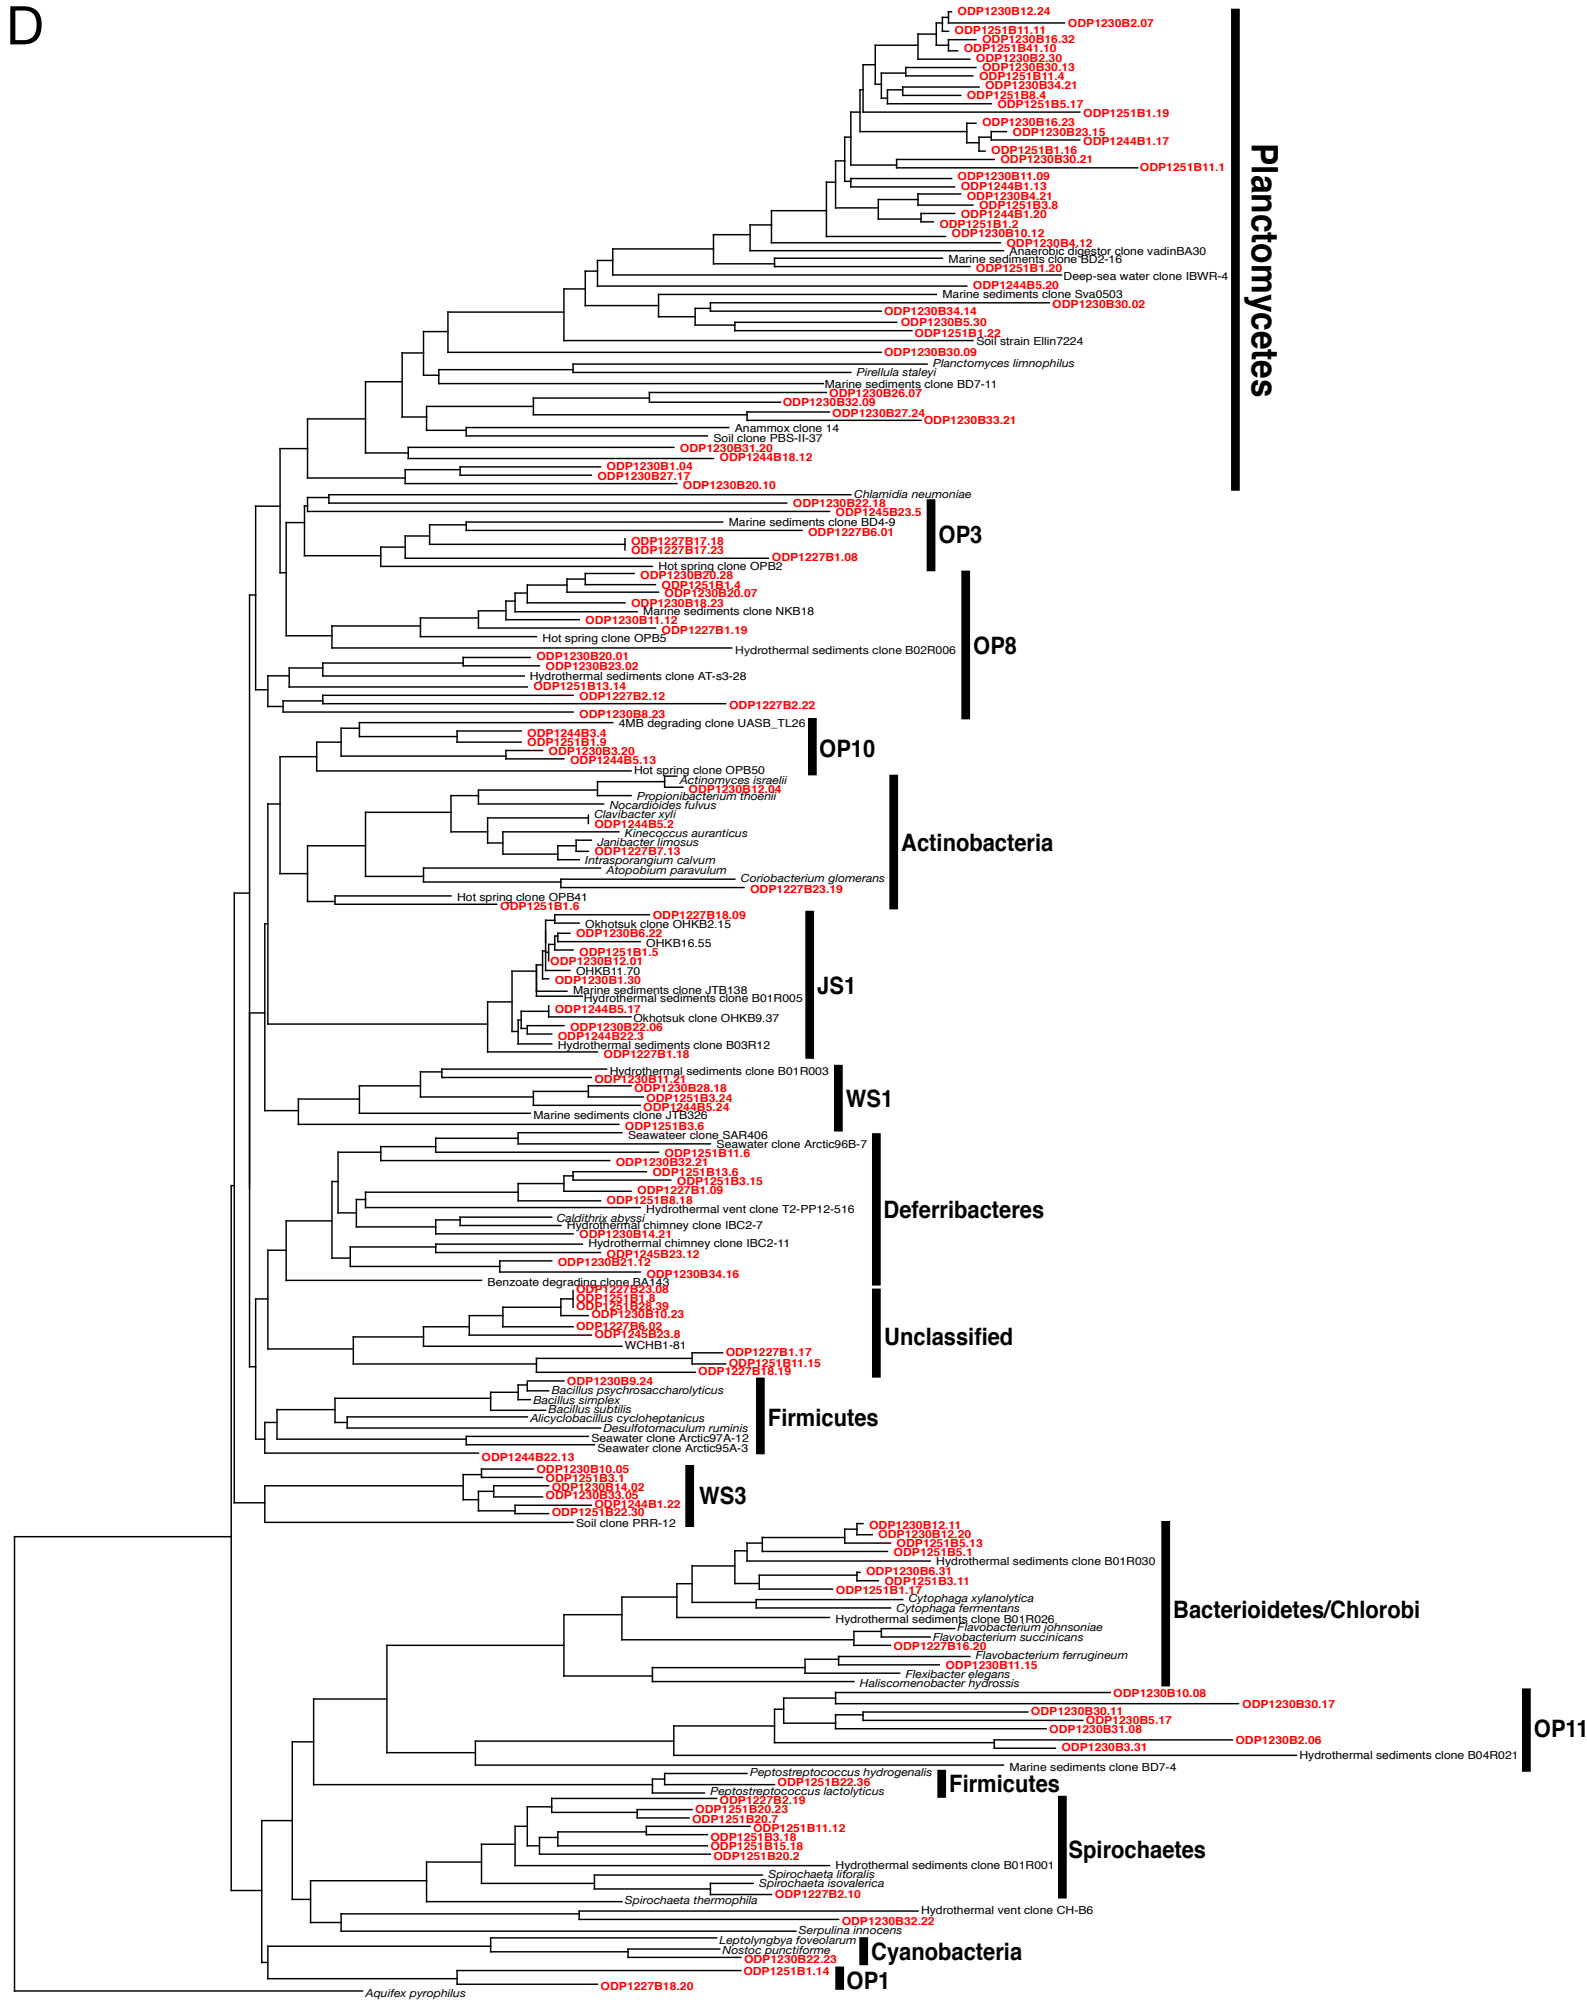

0.01 substitutions/site

E

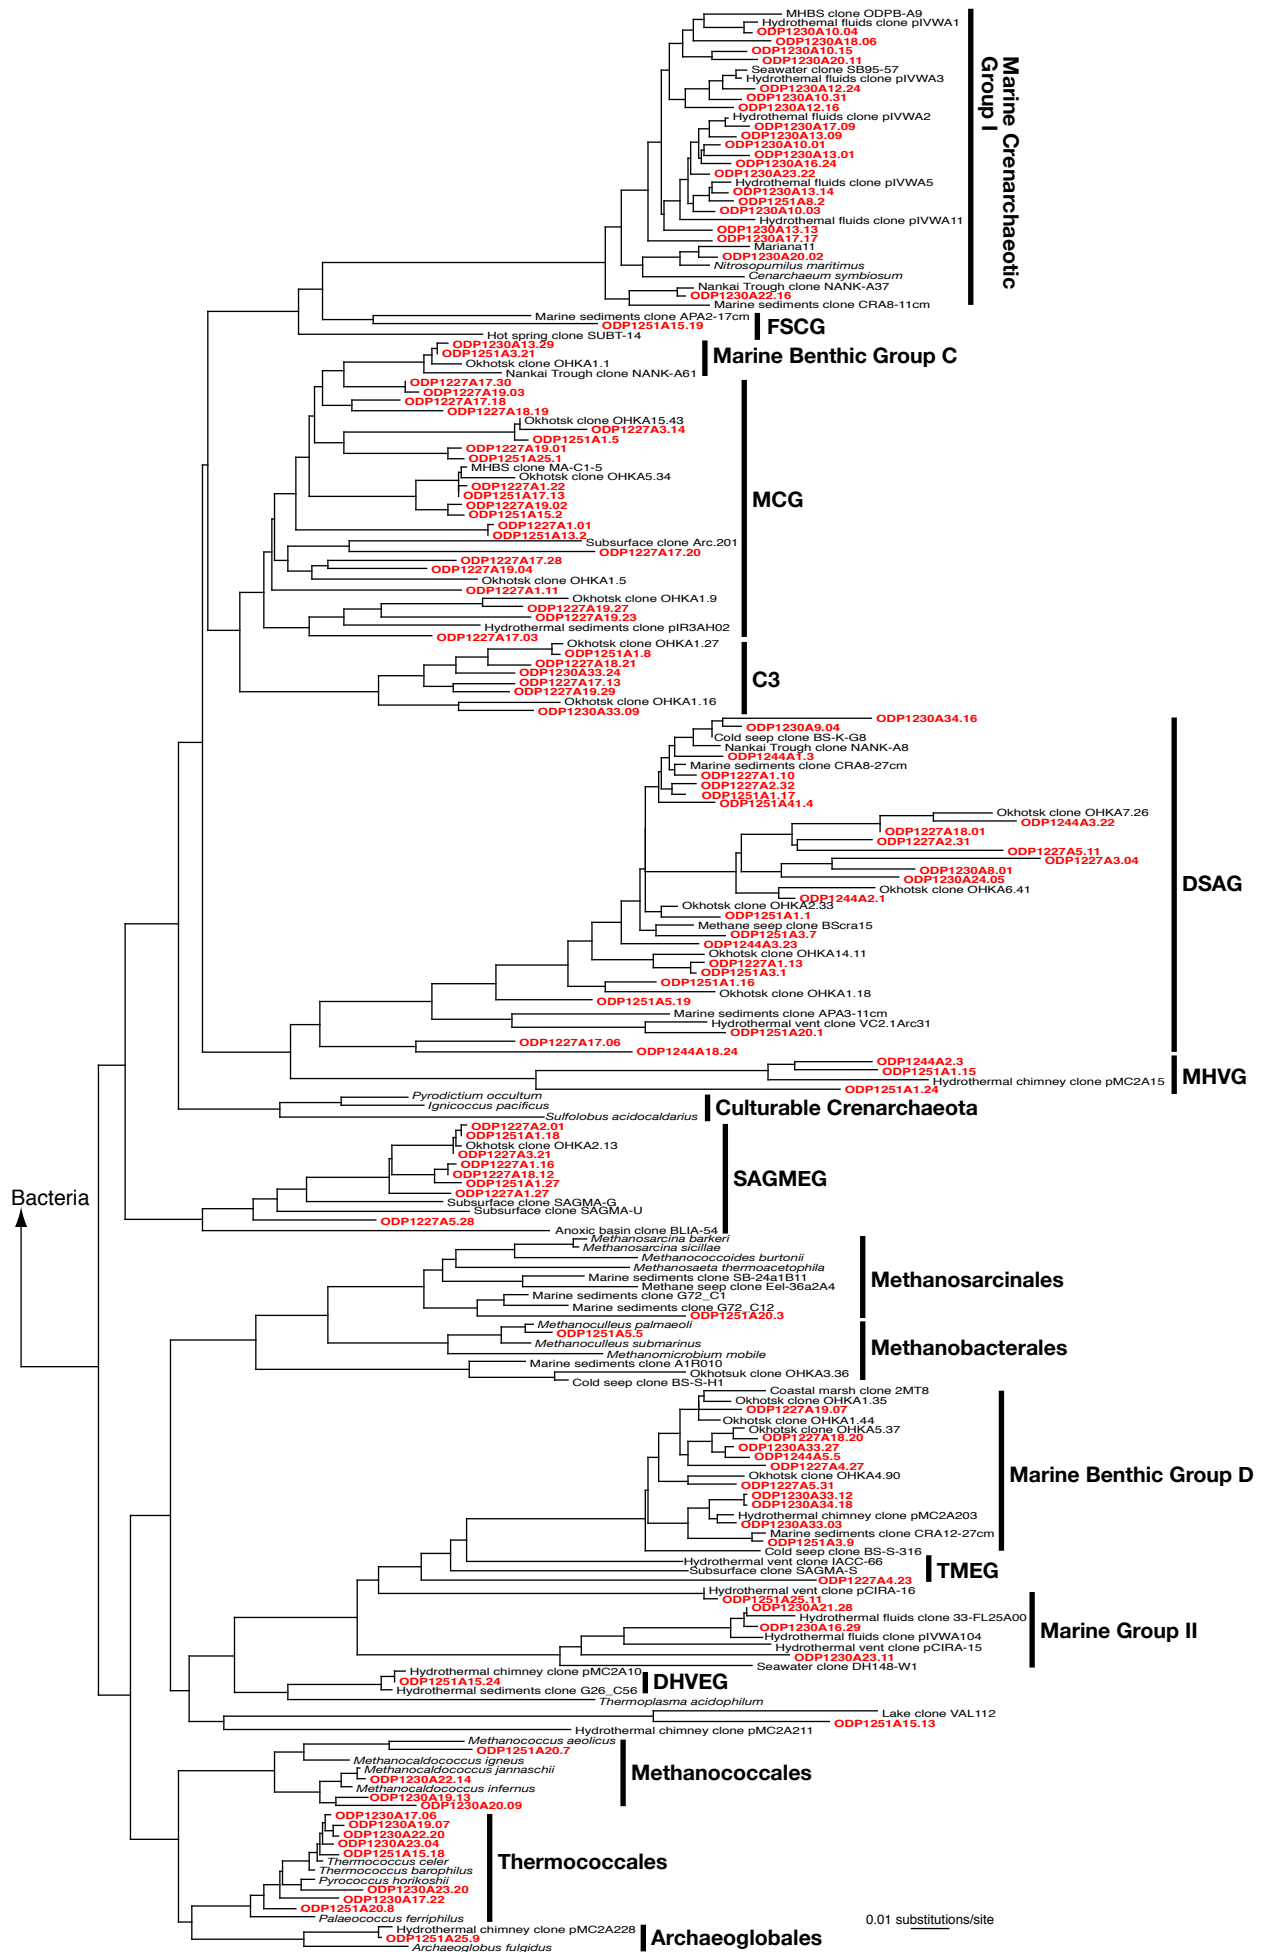

Supplement: pnas_0511033103_2.pdf [file pnas_0511033103_2.pdf]

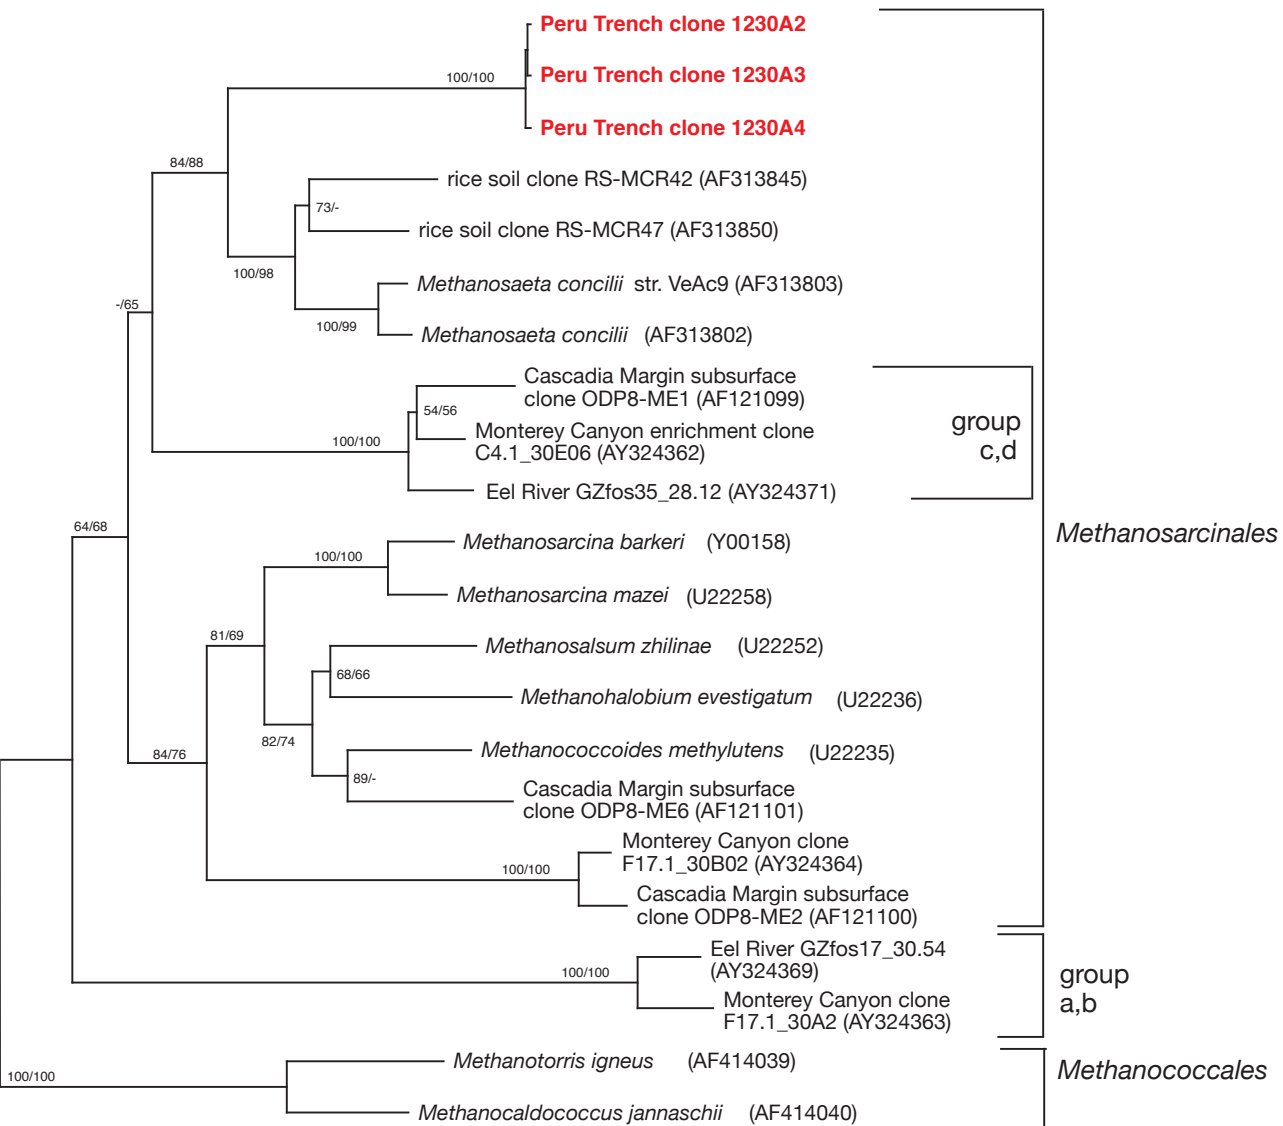

Supplement: pnas_0511033103_3.pdf [file pnas_0511033103_3.pdf]
